# Supplementary material
Source: PubMed Central journal article supplement (PMC10035396)
Supplement: crc-21-0133-s04.pdf [file crc-21-0133-s04.pdf]

**Supplementary Fig. S4**

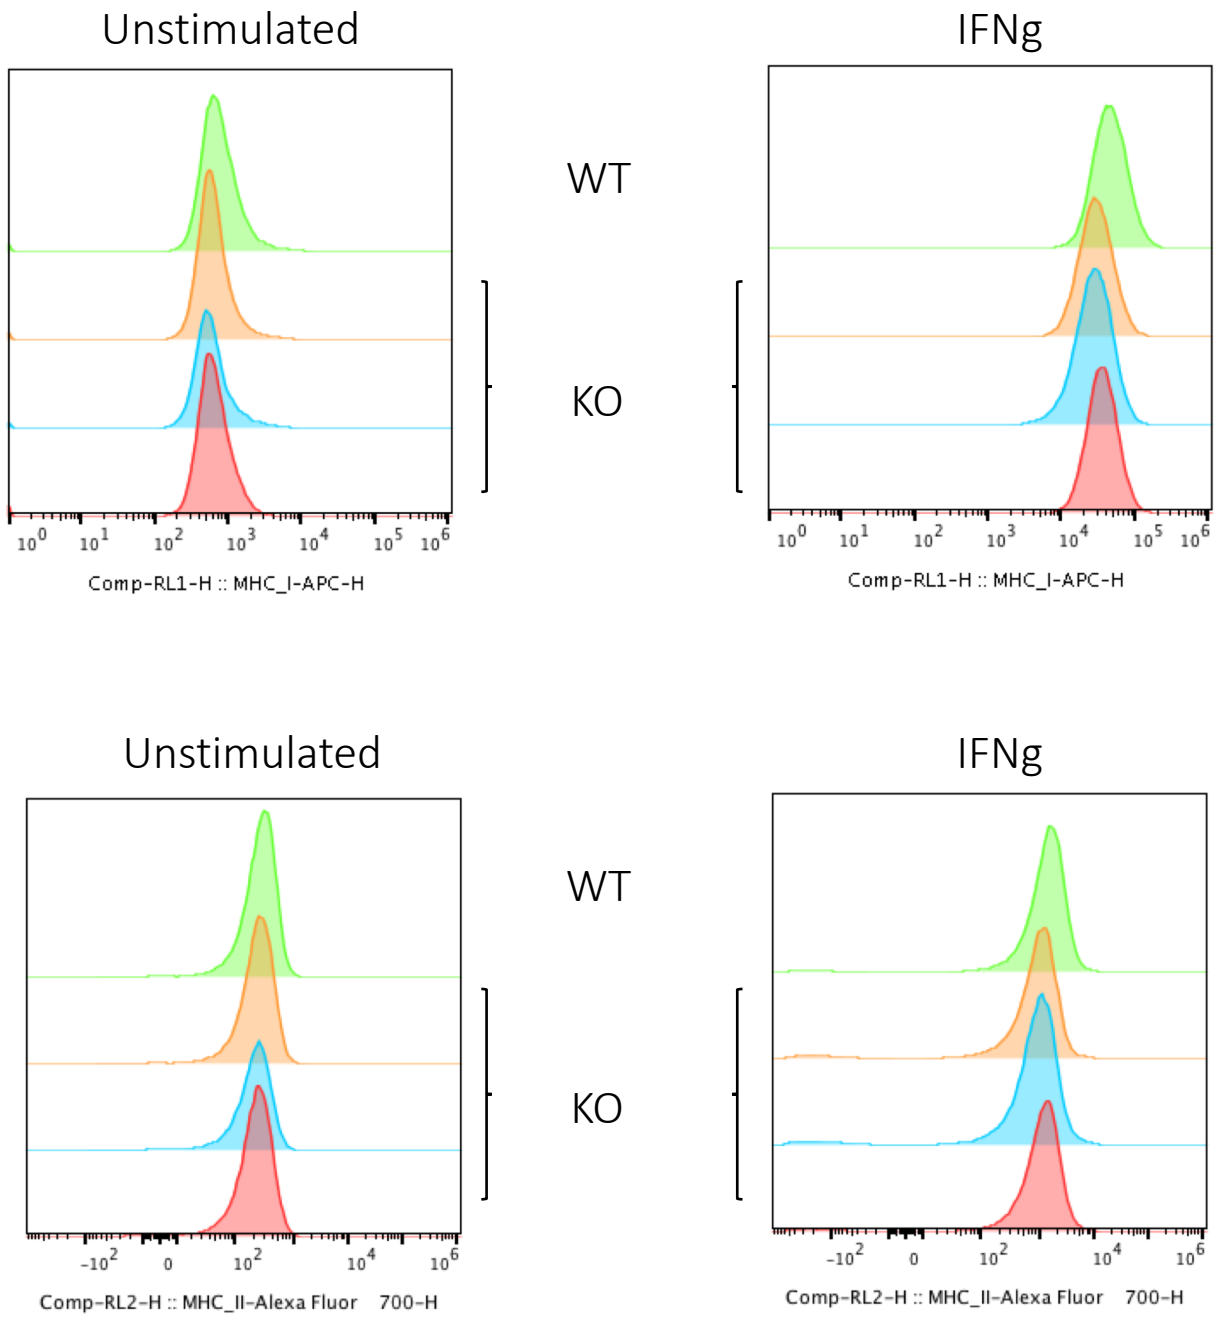

**Supplementary Figure 4: PAK4 deletion does not affect MHC-I and II surface expression.** B16 WT and KO cells were treated with IFN $\gamma$  at 100ng/mL for 6 hours and stained for MHC-I and II expression. No statistical differences between the MHC surface up-regulation in WT and KO cells was found.
