# Supplementary material
Source: PubMed Central journal article supplement (PMC10035396)
Supplement: crc-21-0133-s05.pdf [file crc-21-0133-s05.pdf]

Supplementary Fig. S5

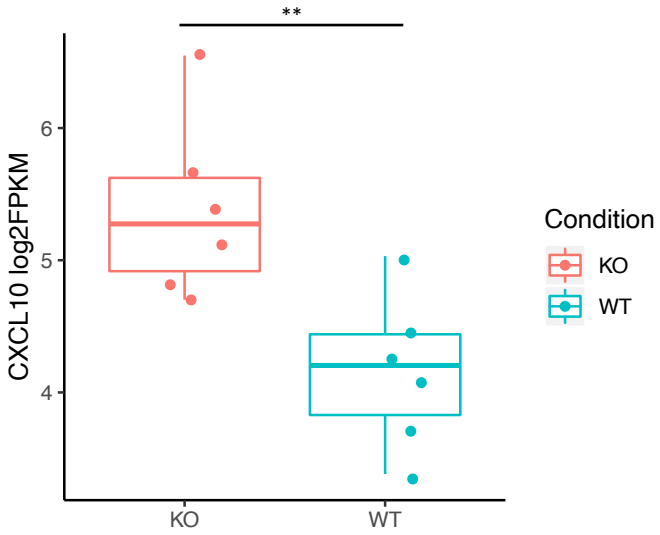

**Supplementary Figure 5: PAK4 deletion increases CXCL10 expression *in vivo*.** Boxplot showing the log2FPKM for CXCL10 at day 6 in PAK4 KO tumors (n= 6) and WT tumors (n = 6). CXCL10 expression is enriched in KO tumors. Statistical significance was calculated using a two-tailed un-paired t-test. \*\*P < 0.01
