# Supplementary material
Source: PubMed Central journal article supplement (PMC10035396)
Supplement: crc-21-0133-s06.pdf [file crc-21-0133-s06.pdf]

# Supplementary Fig. S6

WT anti-PD-1

HALO™ Spatial Plot

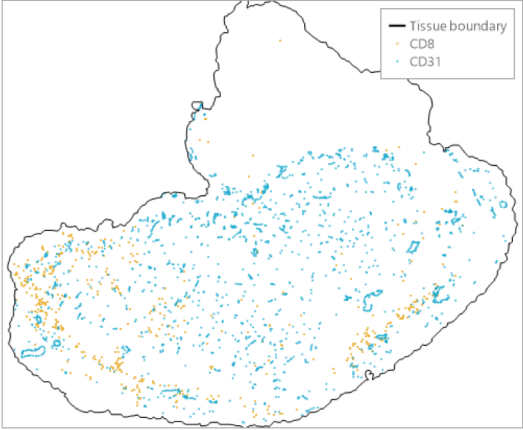

PAK4 KO anti-PD-1

HALO™ Spatial Plot

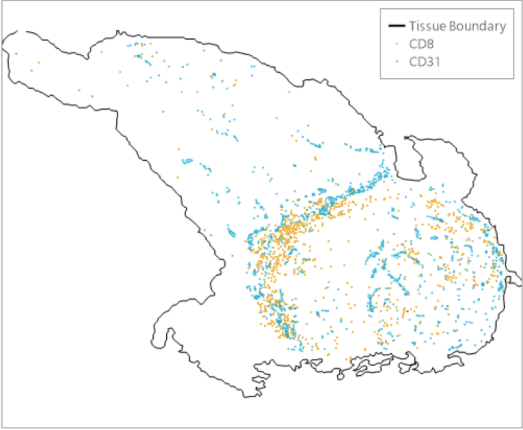

**Supplementary Figure 6: Spatial colocalization of CD8 and CD31 positive cells.** PAK4 KO tumors treated with anti-PD-1 show a high overlap between CD8 and CD31 while WT anti-PD-1 tumors show a more diffuse CD31 distribution without CD8<sup>+</sup>/CD31<sup>+</sup> clusters.
