# Supplementary material
Source: PubMed Central journal article supplement (PMC10035396)
Supplement: crc-21-0133-s07.pdf [file crc-21-0133-s07.pdf]

**Supplementary Fig. S7**

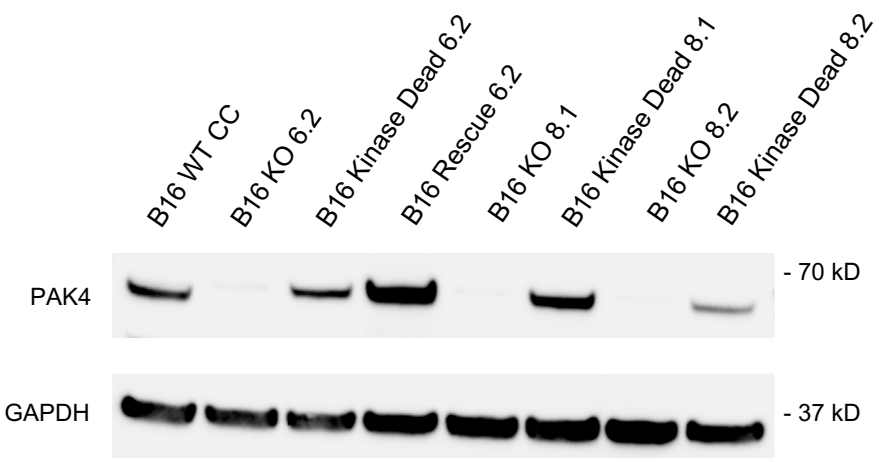

**Supplementary Figure 7: PAK4 protein expression levels in the different cell lines.** Cells were cultured and harvested for protein isolation upon reaching 80% confluency. Showing immunoblot for PAK4 expression protein levels in WT, PAK4 KO, Kinase Dead and Rescue cell lines.
