# Supplementary material
Source: PubMed Central journal article supplement (PMC10035396)
Supplement: crc-21-0133-s08.pdf [file crc-21-0133-s08.pdf]

## Supplementary Fig. S8

a

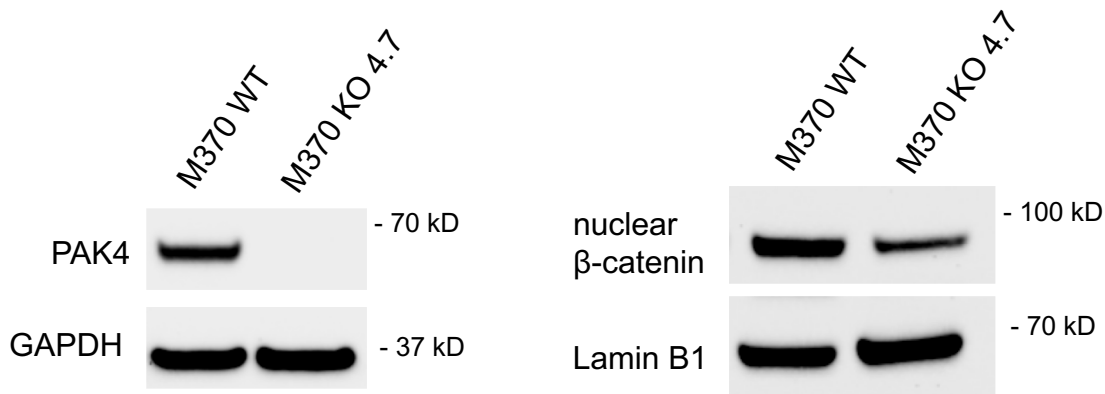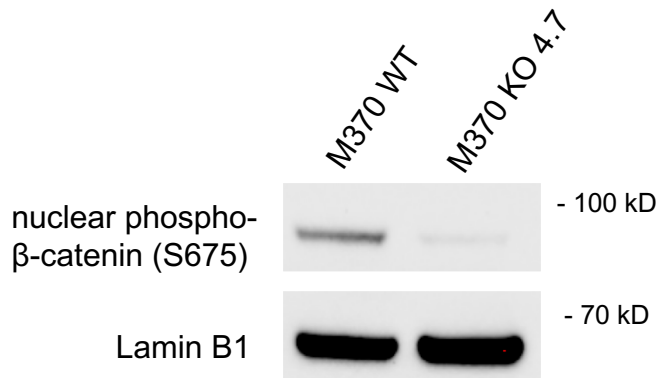

b

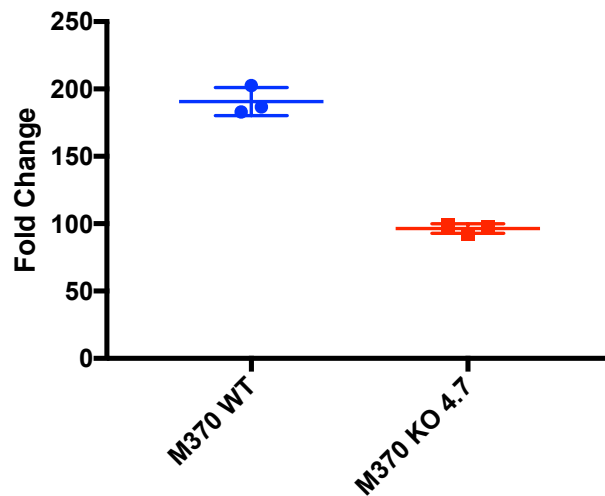

**Supplementary Figure 8: PAK4 KO in human melanoma cells impairs B-catenin/WNT signalling.**  
**a**, Immunoblot for PAK4, nuclear B-catenin and S675 phospho-B-catenin in human melanoma M370 cells. **b**, M370 WT and KO cells were treated with Wnt-3a at 200ng/mL for 8 hours to perform a Topflash assay. Showing the fold change between Wnt-3a treated and untreated cells for both groups. As observed in B16 PAK4 KO cells, PAK4 deletion decreases S675 phosphorylation and reduces sensitivity to Wnt-3a stimulation.
